# Supplementary material for: Identifying Opportunities for Early Detection of Cerebral Palsy
Source: MDPI journal article supplement (doi:10.3390/children11050515), 2024-04-25
Supplement: s1 [file s1]

Supplementary Table S1: Respondent experiences regarding age of diagnosis in Maryland and Delaware

|                                                                                |                                                                                                                                                                                                                                           |
|--------------------------------------------------------------------------------|-------------------------------------------------------------------------------------------------------------------------------------------------------------------------------------------------------------------------------------------|
| <b>Delayed diagnosis common (n = 15)</b>                                       |                                                                                                                                                                                                                                           |
| Too late, Doctor reluctance, Wait and see approach                             | We wait too long! ID50                                                                                                                                                                                                                    |
|                                                                                | It is often diagnosed much later than it should be ID45                                                                                                                                                                                   |
|                                                                                | diagnosis could be earlier, MDs often hesitant to label too quickly, it seems ID56                                                                                                                                                        |
|                                                                                | The doctors tend to be reluctant to diagnose CP early and usually will say "let's wait and see" ID7                                                                                                                                       |
| <b>Some diagnosed early (n = 4)</b>                                            |                                                                                                                                                                                                                                           |
|                                                                                | Some babies are diagnosed w/CP younger than 7 months ID45                                                                                                                                                                                 |
|                                                                                | Early detection recommended as would also select 0-6 months above as well ID20                                                                                                                                                            |
| <b>Age of diagnosis influenced by severity (n = 3)</b>                         |                                                                                                                                                                                                                                           |
| Timing of diagnosis                                                            | depends upon the severity. there are kids who suspect at 0-6m given their presentation and history and may receive a diagnosis that early or 7-12 mo, but more often it is not until kids are not walking by age expected milestone ID 31 |
|                                                                                | They either get a CP dx at birth or it will not be until 18+ months, usually between 18 and 30 months ID 29                                                                                                                               |
|                                                                                | milder cases of diplegia or hemipares, often is delayed to 25 - 36+months ID 92                                                                                                                                                           |
| <b>System factors: Referral and health pathways (n = 20)</b>                   |                                                                                                                                                                                                                                           |
| Diagnostic test limitations                                                    | Usually hear the doctors do not want to do testing (that may or may not involve sedation) until 2 years of age ID32                                                                                                                       |
| Referral delays                                                                | delays in or barriers to getting genetic testing or getting sedated MRI may contribute to perceived delayed diagnosis ID53                                                                                                                |
| Specialty clinics versus community                                             | I think our specialty clinics do a good job of diagnosing CP early. I think there are many patients in the community that come to us later without having been given a Dx ID61                                                            |
| Challenges                                                                     | It is more challenging to get a diagnosis of CP now compared to 20 years ago ID80                                                                                                                                                         |
| <b>Social factors: Family perceptions and attitudes (n = 5)</b>                |                                                                                                                                                                                                                                           |
| Family impact of delay                                                         | The longer diagnosis is deferred, the more difficult for parents and family ID49                                                                                                                                                          |
| Family acceptance/readiness                                                    | diagnosis sometimes takes a while due to other health issues, difficulty accepting that CP may be present by the family, and wanting to rule out other possible explanations first. ID73                                                  |
|                                                                                | working on improving - balancing goal of early diagnosis with individual family need/readiness (without limiting therapies/support) ID34                                                                                                  |
| Parent, provider driven                                                        | Feels children are being treated to address deficits but not getting a formal diagnosis until later unless parents or providers push for a diagnosis ID6                                                                                  |
| <b>Health provider knowledge and perceptions (n = 12)</b>                      |                                                                                                                                                                                                                                           |
| Lack of multidisciplinary working<br>Resistance to change<br>Lack of knowledge | I wish MDs would identify earlier and trust providers ... stop recommending more of the same therapy and identify resources ID41                                                                                                          |
|                                                                                | Yes it is too late in coming when we see signs early enough to discuss much sooner than the pediatrician is willing to ID5                                                                                                                |
|                                                                                | I find that I'm frequently the first professional to discover that they probably have CP. ID95                                                                                                                                            |
| Early 'at risk' diagnosis                                                      | I like to diagnose or at least educate families on the possible diagnosis of CP so they can get the correct services in place ID37                                                                                                        |
| Health provider perceptions/bias                                               | "CP" is such a broad swatch. For the mildest i tend to use another label in medical communications because of the potential for mis-interpretation of its impact on functioning ID48                                                      |
